# Supplementary material
Source: publisher figshare collection journal article supplement (https://asha.figshare.com/articles/dataset/_/10093493)
Supplement: Supplementary file 1 [file 1]

**Supplemental Material S1.** Individual goals per goal attainment scaling method.

**Goal Attainment Scaling for Lab Goals for P1 and level of goal achievement posttreatment (P) and during 1-month maintenance (M). Asterisk reflects baseline score.**

| <b>Goal 1: Scheduling—Lab Goal</b>                                                                                                                                                              |                                                                                                                                                                                              |                                                                                                                                                                                              |                                                                                                                                                                                              |                                                                                                                                                                                                                                |
|-------------------------------------------------------------------------------------------------------------------------------------------------------------------------------------------------|----------------------------------------------------------------------------------------------------------------------------------------------------------------------------------------------|----------------------------------------------------------------------------------------------------------------------------------------------------------------------------------------------|----------------------------------------------------------------------------------------------------------------------------------------------------------------------------------------------|--------------------------------------------------------------------------------------------------------------------------------------------------------------------------------------------------------------------------------|
| <b>−2</b>                                                                                                                                                                                       | <b>−1</b>                                                                                                                                                                                    | <b>0</b>                                                                                                                                                                                     | <b>+1</b>                                                                                                                                                                                    | <b>+2</b>                                                                                                                                                                                                                      |
| <i>Given a list of 8 events to schedule for a given week:</i>                                                                                                                                   |                                                                                                                                                                                              |                                                                                                                                                                                              |                                                                                                                                                                                              |                                                                                                                                                                                                                                |
| *P1 will accurately transfer 0–1 appointment(s) to a weekly calendar.                                                                                                                           | P1 will accurately transfer 2–3 appointments to a weekly calendar.                                                                                                                           | P1 will accurately transfer 4–5 appointments to a weekly calendar.                                                                                                                           | P1 will accurately transfer 6–7 appointments to a weekly calendar.                                                                                                                           | P1 will accurately transfer 8 appointments to a weekly calendar.<br><b>ACHIEVED<sup>P,M</sup></b>                                                                                                                              |
| <b>Goal 2: Planning—Lab Goal</b>                                                                                                                                                                |                                                                                                                                                                                              |                                                                                                                                                                                              |                                                                                                                                                                                              |                                                                                                                                                                                                                                |
| <i>Given a list of 8 events to schedule for a given week:</i>                                                                                                                                   |                                                                                                                                                                                              |                                                                                                                                                                                              |                                                                                                                                                                                              |                                                                                                                                                                                                                                |
| *In his phone planner, P1 will accurately select a reasonable “travel time” and “alert time,” as well as type two activities he needs to do before departing for 0–1 appointment(s) for 1 week. | In his phone planner, P1 will accurately select a reasonable “travel time” and “alert time,” as well as type two activities he needs to do before departing for 2–3 appointments for 1 week. | In his phone planner, P1 will accurately select a reasonable “travel time” and “alert time,” as well as type two activities he needs to do before departing for 4–5 appointments for 1 week. | In his phone planner, P1 will accurately select a reasonable “travel time” and “alert time,” as well as type two activities he needs to do before departing for 6–7 appointments for 1 week. | In his phone planner, P1 will accurately select a reasonable “travel time” and “alert time,” as well as type two activities he needs to do before departing for 8 of appointments for 1 week.<br><b>ACHIEVED<sup>P,M</sup></b> |
| <b>Goal 3: Arriving on Time—Lab Goal</b>                                                                                                                                                        |                                                                                                                                                                                              |                                                                                                                                                                                              |                                                                                                                                                                                              |                                                                                                                                                                                                                                |
| <i>When given 30 minutes (for preparation of 2 events + action; triggered by cell phone alarm)</i>                                                                                              |                                                                                                                                                                                              |                                                                                                                                                                                              |                                                                                                                                                                                              |                                                                                                                                                                                                                                |
| *P1 will arrive lacking preparedness AND timeliness for both events.                                                                                                                            | P1 will arrive lacking preparedness OR timeliness for both events.                                                                                                                           | P1 will arrive prepared and on time for one event, but lacking preparedness AND timeliness for the second event.                                                                             | P1 will arrive prepared and on time for one event, BUT lacking either preparedness or timeliness for the second event.                                                                       | P1 will arrive prepared and on time for both (2) events.<br><b>ACHIEVED<sup>P,M</sup></b>                                                                                                                                      |

**Goal Attainment Scaling for Home Goals for P1 and level of goal achievement posttreatment (P) and during 1-month maintenance (M). Asterisk reflects baseline score.**

| <b>Goal 1: Scheduling—Home Goal</b>                                                                                                                                                                |                                                                                                                                                                                                     |                                                                                                                                                                                                                                    |                                                                                                                                                                                                     |                                                                                                                                                                                                                                     |
|----------------------------------------------------------------------------------------------------------------------------------------------------------------------------------------------------|-----------------------------------------------------------------------------------------------------------------------------------------------------------------------------------------------------|------------------------------------------------------------------------------------------------------------------------------------------------------------------------------------------------------------------------------------|-----------------------------------------------------------------------------------------------------------------------------------------------------------------------------------------------------|-------------------------------------------------------------------------------------------------------------------------------------------------------------------------------------------------------------------------------------|
| <b>−2</b>                                                                                                                                                                                          | <b>−1</b>                                                                                                                                                                                           | <b>0</b>                                                                                                                                                                                                                           | <b>+1</b>                                                                                                                                                                                           | <b>+2</b>                                                                                                                                                                                                                           |
| <i>Prior to the start of each week:</i>                                                                                                                                                            |                                                                                                                                                                                                     |                                                                                                                                                                                                                                    |                                                                                                                                                                                                     |                                                                                                                                                                                                                                     |
| P1 will accurately transfer 0%–19% appointments for the week to his weekly calendar.                                                                                                               | P1 will accurately transfer 20%–39% appointments for the week to his weekly calendar.                                                                                                               | P1 will accurately transfer 40%–59% appointments for the week to his weekly calendar.                                                                                                                                              | P1 will accurately transfer 60%–79% of appointments to his weekly calendar.<br><b>ACHIEVED<sup>P</sup></b>                                                                                          | P1 will accurately transfer 80%–100% of appointments to his weekly calendar.<br><b>ACHIEVED<sup>M</sup></b>                                                                                                                         |
| <b>Goal 2: Planning—Home Goal</b>                                                                                                                                                                  |                                                                                                                                                                                                     |                                                                                                                                                                                                                                    |                                                                                                                                                                                                     |                                                                                                                                                                                                                                     |
| <i>Prior to the start of each week:</i>                                                                                                                                                            |                                                                                                                                                                                                     |                                                                                                                                                                                                                                    |                                                                                                                                                                                                     |                                                                                                                                                                                                                                     |
| In his phone planner, P1 will accurately select a reasonable “travel time” and “alert time,” as well as type two activities he needs to do before departing for 0%–19% of appointments for 1 week. | In his phone planner, P1 will accurately select a reasonable “travel time” and “alert time,” as well as type two activities he needs to do before departing for 20%–39% of appointments for 1 week. | In his phone planner, P1 will accurately select a reasonable “travel time” and “alert time,” as well as type two activities he needs to do before departing for 40%–59% of appointments for 1 week.<br><b>ACHIEVED<sup>M</sup></b> | In his phone planner, P1 will accurately select a reasonable “travel time” and “alert time,” as well as type two activities he needs to do before departing for 60%–79% of appointments for 1 week. | In his phone planner, P1 will accurately select a reasonable “travel time” and “alert time,” as well as type two activities he needs to do before departing for 80%–100% of appointments for 1 week.<br><b>ACHIEVED<sup>P</sup></b> |
| <b>Goal 3: Arriving on Time—Home Goal</b>                                                                                                                                                          |                                                                                                                                                                                                     |                                                                                                                                                                                                                                    |                                                                                                                                                                                                     |                                                                                                                                                                                                                                     |
| P1 will arrive prepared and on time for 0%–19% of appointments across 1 week.                                                                                                                      | P1 will arrive prepared and on time for 20%–39% of appointments across 1 week.                                                                                                                      | P1 will arrive prepared and on time for 40%–59% of appointment across 1 week.                                                                                                                                                      | P1 will arrive prepared and on time for 60%–79% of appointments across 1 week.                                                                                                                      | P1 will arrive prepared and on time for 80%–100% of appointments across 1 week.<br><b>ACHIEVED<sup>P,M</sup></b>                                                                                                                    |

*Note.* Baseline data were not provided by P1’s spouse.

**Goal Attainment Scaling for Lab Goals for P2 and level of goal achievement posttreatment (P) and during 1-month maintenance (M). Asterisk reflects baseline score.**

| <b>Lab Goal 1: Medication Management, Part A (Taking Meds—Accuracy)</b>                                                                                                                                   |                                |                                                     |                                |                                                    |
|-----------------------------------------------------------------------------------------------------------------------------------------------------------------------------------------------------------|--------------------------------|-----------------------------------------------------|--------------------------------|----------------------------------------------------|
| <b>–2</b>                                                                                                                                                                                                 | <b>–1</b>                      | <b>0</b>                                            | <b>+1</b>                      | <b>+2</b>                                          |
| <i>Across 7 trials, when given a pill organizer and audible + visual alarms (prompting her to take meds) P2 will...</i>                                                                                   |                                |                                                     |                                |                                                    |
| *Make 4 mistakes                                                                                                                                                                                          | Make 3 mistakes                | Make 2 mistakes                                     | Make 1 mistake                 | Make 0 mistakes<br><b>ACHIEVED<sup>P,M</sup></b>   |
| <i>Note. Mistakes are defined as choosing the wrong day and/or time compartment: morning, noon, evening, bed.</i>                                                                                         |                                |                                                     |                                |                                                    |
| <b>Lab Goal 1: Medication Management, Part B (Taking Meds—Effort)</b>                                                                                                                                     |                                |                                                     |                                |                                                    |
| <i>Across 7 trials, The effort it takes P2 to take the correct medications will be</i>                                                                                                                    |                                |                                                     |                                |                                                    |
| <sup>NB</sup> Extremely Effortful                                                                                                                                                                         | Extremely—moderately effortful | Moderately effortful<br><b>ACHIEVED<sup>M</sup></b> | Moderately—Minimally Effortful | Minimally Effortful<br><b>ACHIEVED<sup>P</sup></b> |
| <b>Lab Goal 1: Medication Management, Part C (Alarm + Meds)</b>                                                                                                                                           |                                |                                                     |                                |                                                    |
| <i>When given the scenario that she is eating a meal while her alarm activates, P2 will accurately set an alarm for 45 minutes titled “take pills” (prompting her to take pills at the later time)...</i> |                                |                                                     |                                |                                                    |
| *0 times.                                                                                                                                                                                                 | 1 time.                        | 2 times.                                            | 3 times.                       | 4 times.<br><b>ACHIEVED<sup>P,M</sup></b>          |

*Note.* <sup>NB</sup> = no baseline score.

| <b>Lab Goal 3: Desk Organization, Part A</b>                                                                                                             |                                           |                                          |                                             |                                                                              |
|----------------------------------------------------------------------------------------------------------------------------------------------------------|-------------------------------------------|------------------------------------------|---------------------------------------------|------------------------------------------------------------------------------|
| <b>–2</b>                                                                                                                                                | <b>–1</b>                                 | <b>0</b>                                 | <b>+1</b>                                   | <b>+2</b>                                                                    |
| <i>Across 5 trials: When given 15 notes and objects, triggered by an audible + visual alarm prompting task, P2 will correctly organize (on average):</i> |                                           |                                          |                                             |                                                                              |
| 0–3 objects into their designated spaces                                                                                                                 | 4–6 objects into their designated spaces. | 7–9 objects into their designated spaces | *10–12 objects into their designated spaces | 13–15 objects into their designated spaces.<br><b>ACHIEVED<sup>P,M</sup></b> |

| <b>Lab Goal 3: Desk Organization, Part B (All Correct)</b>                                                                                       |                                                                                |                                                                                |                                                                                                               |                                                                                                               |
|--------------------------------------------------------------------------------------------------------------------------------------------------|--------------------------------------------------------------------------------|--------------------------------------------------------------------------------|---------------------------------------------------------------------------------------------------------------|---------------------------------------------------------------------------------------------------------------|
| <i>Across 5 trials: When given 15 notes and objects, triggered by an audible + visual alarm prompting task, P2 will:</i>                         |                                                                                |                                                                                |                                                                                                               |                                                                                                               |
| *Correctly organize all objects into their designated spaces for 0–1 of 5 trials.                                                                | Correctly organize all objects into their designated spaces for 2 of 5 trials. | Correctly organize all objects into their designated spaces for 3 of 5 trials. | Correctly organize all objects into their designated spaces for 4 of 5 trials.<br><b>ACHIEVED<sup>M</sup></b> | Correctly organize all objects into their designated spaces for 5 of 5 trials.<br><b>ACHIEVED<sup>P</sup></b> |
| <b>Lab Goal 3: Desk Organization, Part C</b>                                                                                                     |                                                                                |                                                                                |                                                                                                               |                                                                                                               |
| <i>Across 5 trials: When given 15 notes and objects, triggered by an audible + visual alarm prompting task, P2 it will take her (on average)</i> |                                                                                |                                                                                |                                                                                                               |                                                                                                               |
| 4–5 minutes to organize items.                                                                                                                   | *3–4 minutes to organize items.                                                | 2–3 minutes to organize items.<br><b>ACHIEVED<sup>P,M</sup></b>                | 1–2 minutes to organize items.                                                                                | 0–1 minutes to organize items.                                                                                |
| Designates spaces include on the desk and in hanging files beside desk.                                                                          |                                                                                |                                                                                |                                                                                                               |                                                                                                               |

| <b>Lab Goal 6: Scheduling Her Week</b>                                                    |                                                                                         |                                                                                                                         |                                                                                                                         |                                                                                        |
|-------------------------------------------------------------------------------------------|-----------------------------------------------------------------------------------------|-------------------------------------------------------------------------------------------------------------------------|-------------------------------------------------------------------------------------------------------------------------|----------------------------------------------------------------------------------------|
| <b>–2</b>                                                                                 | <b>–1</b>                                                                               | <b>0</b>                                                                                                                | <b>+1</b>                                                                                                               | <b>+2</b>                                                                              |
| <i>When given a list of 4 appointments to schedule:</i>                                   |                                                                                         |                                                                                                                         |                                                                                                                         |                                                                                        |
| *Using voice command, P2 will accurately schedule 0 appointments into her phone calendar. | Using voice command, P2 will accurately schedule 1 appointment into her phone calendar. | Using voice command, P2 will accurately schedule 2 appointments into her phone calendar.<br><b>ACHIEVED<sup>P</sup></b> | Using voice command, P2 will accurately schedule 3 appointments into her phone calendar.<br><b>ACHIEVED<sup>M</sup></b> | Using voice command, P2 will accurately schedule 4 appointments in her phone calendar. |

**Goal Attainment Scaling for Home Goals for P2 and level of goal achievement posttreatment (P) and during 1-month maintenance (M). Asterisk reflects baseline score.**

| <b>Home Goal 1: Medication Management, Part A (Taking Meds—Accuracy)</b>                                                                                                                                                                                                             |                                |                                                     |                                                  |                                                      |
|--------------------------------------------------------------------------------------------------------------------------------------------------------------------------------------------------------------------------------------------------------------------------------------|--------------------------------|-----------------------------------------------------|--------------------------------------------------|------------------------------------------------------|
| <b>–2</b>                                                                                                                                                                                                                                                                            | <b>–1</b>                      | <b>0</b>                                            | <b>+1</b>                                        | <b>+2</b>                                            |
| <i>When given a pill organizer and audible + visual alarms (prompting her to take meds) P2 will...</i>                                                                                                                                                                               |                                |                                                     |                                                  |                                                      |
| Make 4 mistakes                                                                                                                                                                                                                                                                      | Make 3 mistakes                | *Make 2 mistakes                                    | Make 1 mistake                                   | Make 0 mistakes<br><b>ACHIEVED<sup>P,M</sup></b>     |
| <i>Note. P2 takes pills 3 times/day, 7 days/week, equaling 21 times/week she needs to take pills. Mistakes are defined as taking medications at the wrong time, not taking medications, or taking medications from an incorrect day or compartment: morning, noon, evening, bed.</i> |                                |                                                     |                                                  |                                                      |
| <b>Home Goal 1: Medication Management, Part B (Taking Meds—Effort)</b>                                                                                                                                                                                                               |                                |                                                     |                                                  |                                                      |
| <i>When given a pill organizer and audible + visual alarms (prompting her to take meds); The effort it takes P2 to take the correct medications will be</i>                                                                                                                          |                                |                                                     |                                                  |                                                      |
| Extremely Effortful                                                                                                                                                                                                                                                                  | Extremely—moderately effortful | Moderately effortful<br><b>ACHIEVED<sup>P</sup></b> | *Moderately—Minimally Effortful                  | Minimally Effortful<br><b>ACHIEVED<sup>M</sup></b>   |
| <b>Home Goal 1: Medication Management, Part C (Filling Meds—Accuracy)</b>                                                                                                                                                                                                            |                                |                                                     |                                                  |                                                      |
| <i>Across 1 week, she will be ____% accurate in correctly filling her pills in her pill organizer:</i>                                                                                                                                                                               |                                |                                                     |                                                  |                                                      |
| *80%                                                                                                                                                                                                                                                                                 | 85%                            | 90%<br><b>ACHIEVED<sup>M</sup></b>                  | 95%                                              | 100%<br><b>ACHIEVED<sup>P</sup></b>                  |
| <b>Home Goal 1: Medication Management, Part D (Filling Meds—Effort)</b>                                                                                                                                                                                                              |                                |                                                     |                                                  |                                                      |
| <i>The effort it takes P2 to correctly fill her pills in her pill organizer will be:</i>                                                                                                                                                                                             |                                |                                                     |                                                  |                                                      |
| Extremely effortful                                                                                                                                                                                                                                                                  | Extremely—Moderately Effortful | *Moderately Effortful                               | Moderately—Minimally Effortful                   | Minimally Effortful<br><b>ACHIEVED<sup>P,M</sup></b> |
| <b>Home Goal 1: Medication Management, Part E (Alarms + Meds)</b>                                                                                                                                                                                                                    |                                |                                                     |                                                  |                                                      |
| <i>If alarm for medication activates when she is eating a meal, P2 will set alarm for 45 minutes (prompting her to take pills at the later time)...</i>                                                                                                                              |                                |                                                     |                                                  |                                                      |
| *None of the time.                                                                                                                                                                                                                                                                   | Some of the time.              | Half of the time.                                   | Most of the time.<br><b>ACHIEVED<sup>P</sup></b> | All of the time.                                     |

| Home Goal 3: Desk Organization, Part A                                                                                                   |                                 |                         |                                                      |                                                         |
|------------------------------------------------------------------------------------------------------------------------------------------|---------------------------------|-------------------------|------------------------------------------------------|---------------------------------------------------------|
| -2                                                                                                                                       | -1                              | 0                       | +1                                                   | +2                                                      |
| <i>When daily audible and visual alarm activates, P2 will categorize objects on/in desk into their designated spaces...</i>              |                                 |                         |                                                      |                                                         |
| 0 days per week.                                                                                                                         | 1–2 day(s) per week.            | 3–4 days per week.      | *5–6 days per week.<br><b>ACHIEVED<sup>P,M</sup></b> | 7 days per week.                                        |
| Objects include ongoing projects (i.e. passport documentation), sticky notes, checklists, daily notes, jewelry, paperwork, pencils/pens. |                                 |                         |                                                      |                                                         |
| Home Goal 3: Desk Organization, Part B                                                                                                   |                                 |                         |                                                      |                                                         |
| <i>On the final evening of the week, objects on/in her desk will be:</i>                                                                 |                                 |                         |                                                      |                                                         |
| *Not at all organized.                                                                                                                   | Somewhat organized.             | Half will be organized. | Most will be organized.                              | All will be organized.<br><b>ACHIEVED<sup>P,M</sup></b> |
| Home Goal 3: Desk Organization, Part C                                                                                                   |                                 |                         |                                                      |                                                         |
| <i>The effort it takes P2 to organize her desk across one week will be:</i>                                                              |                                 |                         |                                                      |                                                         |
| Extremely effortful                                                                                                                      | *Extremely–Moderately Effortful | Moderately Effortful    | Moderately–Minimally Effortful                       | Minimally Effortful<br><b>ACHIEVED<sup>P,M</sup></b>    |

| Home Goal 6: Scheduling Her Week                                            |                                                                              |                                                                              |                                                                               |                                                                                                                |
|-----------------------------------------------------------------------------|------------------------------------------------------------------------------|------------------------------------------------------------------------------|-------------------------------------------------------------------------------|----------------------------------------------------------------------------------------------------------------|
| -2                                                                          | -1                                                                           | 0                                                                            | +1                                                                            | +2                                                                                                             |
| <i>Prior to the start of each week:</i>                                     |                                                                              |                                                                              |                                                                               |                                                                                                                |
| P2 will accurately schedule 0%–19% of appointments into her phone calendar. | P2 will accurately schedule 20%–39% of appointments into her phone calendar. | P2 will accurately schedule 40%–59% of appointments into her phone calendar. | *P2 will accurately schedule 60%–79% of appointments into her phone calendar. | P2 will accurately schedule 80%–100% of appointments into her phone calendar.<br><b>ACHIEVED<sup>P,M</sup></b> |

| Home Goal 7: Arriving on Time        |                                    |                                     |                                    |                                                                      |
|--------------------------------------|------------------------------------|-------------------------------------|------------------------------------|----------------------------------------------------------------------|
| -2                                   | -1                                 | 0                                   | +1                                 | +2                                                                   |
| <i>P2 will make it to (not miss)</i> |                                    |                                     |                                    |                                                                      |
| 60% of appointments across 1 week.   | 70% of appointments across 1 week. | *80% of appointments across 1 week. | 90% of appointments across 1 week. | 100% of appointments across 1 week.<br><b>ACHIEVED<sup>P,M</sup></b> |

*Note.* \* = baseline score; <sup>P</sup> = posttreatment; <sup>M</sup> = maintenance; <sup>NB</sup> = no baseline score.

**Goal Attainment Scaling for Lab Goals for P3 and level of goal achievement posttreatment (P) and during 1-month maintenance (M). Asterisk reflects baseline score.**

| <b>Lab Goal 1: Note Organization</b>                                                                   |                                                                |                                                                 |                                                                                                  |                                                                 |
|--------------------------------------------------------------------------------------------------------|----------------------------------------------------------------|-----------------------------------------------------------------|--------------------------------------------------------------------------------------------------|-----------------------------------------------------------------|
| <b>-2</b>                                                                                              | <b>-1</b>                                                      | <b>0</b>                                                        | <b>+1</b>                                                                                        | <b>+2</b>                                                       |
| <i>When given 4 pieces of information (e.g. dr. 's orders, to-do items, conversation memos, etc.):</i> |                                                                |                                                                 |                                                                                                  |                                                                 |
| *P3 will correctly categorize 0 items using the Google Keep App.                                       | P3 will correctly categorize 1 item using the Google Keep App. | P3 will correctly categorize 2 items using the Google Keep App. | P3 will correctly categorize 3 items using the Google Keep App.<br><b>ACHIEVED<sup>P,M</sup></b> | P3 will correctly categorize 4 items using the Google Keep App. |

| <b>Lab Goal 2: Scheduling</b>                                        |                                                                    |                                                                     |                                                                                                    |                                                                                                  |
|----------------------------------------------------------------------|--------------------------------------------------------------------|---------------------------------------------------------------------|----------------------------------------------------------------------------------------------------|--------------------------------------------------------------------------------------------------|
| <i>Given a list of 4 appointments to schedule:</i>                   |                                                                    |                                                                     |                                                                                                    |                                                                                                  |
| *P3 will accurately schedule 0 appointments into his phone calendar. | P3 will accurately schedule 1 appointment into his phone calendar. | P3 will accurately schedule 2 appointments into his phone calendar. | P3 will accurately schedule 3 appointments into his phone calendar.<br><b>ACHIEVED<sup>M</sup></b> | P3 will accurately schedule 4 appointments in his phone calendar.<br><b>ACHIEVED<sup>P</sup></b> |

| <b>Lab Goal 3 (Part A): Planning his Day</b>                                              |                                                                |                                                                  |                                                                   |                                                                                                   |
|-------------------------------------------------------------------------------------------|----------------------------------------------------------------|------------------------------------------------------------------|-------------------------------------------------------------------|---------------------------------------------------------------------------------------------------|
| <i>When given 2 scheduled activities on his phone calendar and his Day Planning List:</i> |                                                                |                                                                  |                                                                   |                                                                                                   |
| P3 will circle 0 "planning activities" on his Day Planning List.                          | P3 will circle 1 "planning activity" on his Day Planning List. | P3 will circle 2 "planning activities" on his Day Planning List. | *P3 will circle 3 "planning activities" on his Day Planning List. | P3 will circle 4 "planning activities" on his Day Planning List.<br><b>ACHIEVED<sup>P,M</sup></b> |
| Planning activities are all activities on his list that are not "scheduled appointments." |                                                                |                                                                  |                                                                   |                                                                                                   |



| <b>Lab Goal 3 (Part B): Planning His Day</b>                                                                                    |                                                                                                                                |                                                                                                                                |                                                                                                                                                               |                                                                                                                                                               |
|---------------------------------------------------------------------------------------------------------------------------------|--------------------------------------------------------------------------------------------------------------------------------|--------------------------------------------------------------------------------------------------------------------------------|---------------------------------------------------------------------------------------------------------------------------------------------------------------|---------------------------------------------------------------------------------------------------------------------------------------------------------------|
| <b>-2</b>                                                                                                                       | <b>-1</b>                                                                                                                      | <b>0</b>                                                                                                                       | <b>+1</b>                                                                                                                                                     | <b>+2</b>                                                                                                                                                     |
| <i>When given 2 scheduled activities on his phone calendar and four circled "planning activities" on his Day Planning List:</i> |                                                                                                                                |                                                                                                                                |                                                                                                                                                               |                                                                                                                                                               |
| *P3 will enter 0 planning activities into his phone calendar at a reasonable time (not overlapping with schedule appointments). | P3 will enter 0 planning activities into his phone calendar at a reasonable time (not overlapping with schedule appointments). | P3 will enter 0 planning activities into his phone calendar at a reasonable time (not overlapping with schedule appointments). | P3 will enter 0 planning activities into his phone calendar at a reasonable time (not overlapping with schedule appointments).<br><b>ACHIEVED<sup>M</sup></b> | P3 will enter 0 planning activities into his phone calendar at a reasonable time (not overlapping with schedule appointments).<br><b>ACHIEVED<sup>P</sup></b> |

| <b>Lab Goal 4: Initiation</b>                                                                                                          |                                                      |                                                      |                                                                                     |                                                                                     |
|----------------------------------------------------------------------------------------------------------------------------------------|------------------------------------------------------|------------------------------------------------------|-------------------------------------------------------------------------------------|-------------------------------------------------------------------------------------|
| <i>Following audible + visual phone alarms (linked to four simple, 1-step tasks; 30 minutes following the creation of the alarms):</i> |                                                      |                                                      |                                                                                     |                                                                                     |
| P3 will initiate 0 tasks within 15 seconds of alarm.                                                                                   | *P3 will initiate 1 task within 15 seconds of alarm. | P3 will initiate 2 tasks within 15 seconds of alarm. | P3 will initiate 3 tasks within 15 seconds of alarm.<br><b>ACHIEVED<sup>M</sup></b> | P3 will initiate 4 tasks within 15 seconds of alarm.<br><b>ACHIEVED<sup>P</sup></b> |

| <b>Lab Goal 5 (Part A): Texting—Composing/Sending</b>                                                                                                                                          |                                                                                                  |                                           |                                                                                          |                                                                             |
|------------------------------------------------------------------------------------------------------------------------------------------------------------------------------------------------|--------------------------------------------------------------------------------------------------|-------------------------------------------|------------------------------------------------------------------------------------------|-----------------------------------------------------------------------------|
| <i>When given 2 research team members' numbers, and a topic of discussion (e.g., social greeting, inviting someone to a show, confirming meeting place and time for an appointment, etc.).</i> |                                                                                                  |                                           |                                                                                          |                                                                             |
| *P3 will compose and send 0 text messages.                                                                                                                                                     | P will send 1 message that is blank/indecipherable, and will not compose/send the other message. | P3 will compose and send 1 clear message. | P will send 1 clear message, and will send another message that is blank/indecipherable. | P3 will compose and send 2 clear messages.<br><b>ACHIEVED<sup>P,M</sup></b> |

|                                                                                                                                                                                                                                                                     |                                                                                                                                |                                                      |                                                                                                                     |                                                |
|---------------------------------------------------------------------------------------------------------------------------------------------------------------------------------------------------------------------------------------------------------------------|--------------------------------------------------------------------------------------------------------------------------------|------------------------------------------------------|---------------------------------------------------------------------------------------------------------------------|------------------------------------------------|
| *A clear message indicates a text that is (1) not a blank/empty (i.e., no text whatsoever), and (2) it is decipherable enough to derive meaning. Grammar and syntax are not necessarily perfect, but word order and spelling need to be adequate to derive meaning. |                                                                                                                                |                                                      |                                                                                                                     |                                                |
| <b>Lab Goal 5 (Part B): Texting—Replying</b>                                                                                                                                                                                                                        |                                                                                                                                |                                                      |                                                                                                                     |                                                |
| <b>−2</b>                                                                                                                                                                                                                                                           | <b>−1</b>                                                                                                                      | <b>0</b>                                             | <b>+1</b>                                                                                                           | <b>+2</b>                                      |
| When 2 research team members text P3:                                                                                                                                                                                                                               |                                                                                                                                |                                                      |                                                                                                                     |                                                |
| P3 will send 0 replies to both text messages.                                                                                                                                                                                                                       | P will send 1 reply that is blank/indecipherable, and will not reply to the other text message.<br><b>ACHIEVED<sup>P</sup></b> | *P3 will send a clear reply to 1 of 2 text messages. | P will send 1 clear reply, and will send another reply that is blank/indecipherable.<br><b>ACHIEVED<sup>M</sup></b> | P3 will send a clear reply to 2 text messages. |

**Goal Attainment Scaling for Home Goals for P3 and level of goal achievement posttreatment (P) and during 1-month maintenance (M). Asterisk reflects baseline score.**

|                                                                                                                                                                                                     |                                                                                                                                 |                                                                                                                             |                                                                                                                                          |                                                                                                                            |
|-----------------------------------------------------------------------------------------------------------------------------------------------------------------------------------------------------|---------------------------------------------------------------------------------------------------------------------------------|-----------------------------------------------------------------------------------------------------------------------------|------------------------------------------------------------------------------------------------------------------------------------------|----------------------------------------------------------------------------------------------------------------------------|
| <b>Home Goal 1: Note Organization</b>                                                                                                                                                               |                                                                                                                                 |                                                                                                                             |                                                                                                                                          |                                                                                                                            |
| <b>−2</b>                                                                                                                                                                                           | <b>−1</b>                                                                                                                       | <b>0</b>                                                                                                                    | <b>+1</b>                                                                                                                                | <b>+2</b>                                                                                                                  |
| <i>At the end of each week:</i>                                                                                                                                                                     |                                                                                                                                 |                                                                                                                             |                                                                                                                                          |                                                                                                                            |
| *None of his notes will be entered in Google Keep App; he continued to use his current note taking system (multiple sticky notes, lists in multiple places, etc.).<br><b>ACHIEVED<sup>P,M</sup></b> | Some of his notes will be entered in Google Keep App, with majority of his notes existing outside the app (sticky notes, etc.). | Half of his notes will be entered in Google Keep App, with half of his notes existing outside the app (sticky notes, etc.). | The majority of his notes will be entered in Google Keep App, with only some of his notes existing outside the app (sticky notes, etc.). | All of his notes will be entered in Google Keep App, with none of his notes existing outside the app (sticky notes, etc.). |

| <b>Home Goal 2: Scheduling</b>                                               |                                                                              |                                                                                                             |                                                                              |                                                                             |
|------------------------------------------------------------------------------|------------------------------------------------------------------------------|-------------------------------------------------------------------------------------------------------------|------------------------------------------------------------------------------|-----------------------------------------------------------------------------|
| <i>Prior to the start of each week:</i>                                      |                                                                              |                                                                                                             |                                                                              |                                                                             |
| <b>–2</b>                                                                    | <b>–1</b>                                                                    | <b>0</b>                                                                                                    | <b>+1</b>                                                                    | <b>+2</b>                                                                   |
| *P3 will accurately schedule 0%–19% of appointments into his phone calendar. | P3 will accurately schedule 20%–39% of appointments into his phone calendar. | P3 will accurately schedule 40%–59% of appointments into his phone calendar.<br><b>ACHIEVED<sup>P</sup></b> | P3 will accurately schedule 60%–79% of appointments into his phone calendar. | P3 will accurately schedule 80%–100% of appointments in his phone calendar. |

| <b>Home Goal 3: Planning his Day</b>                                                                                                                           |                                                                                                                      |                                                                                                                                                     |                                                                                                                                                      |                                                                                                                    |
|----------------------------------------------------------------------------------------------------------------------------------------------------------------|----------------------------------------------------------------------------------------------------------------------|-----------------------------------------------------------------------------------------------------------------------------------------------------|------------------------------------------------------------------------------------------------------------------------------------------------------|--------------------------------------------------------------------------------------------------------------------|
| <i>Following daily alarm to schedule his day</i>                                                                                                               |                                                                                                                      |                                                                                                                                                     |                                                                                                                                                      |                                                                                                                    |
| On his phone calendar, P3 will schedule at least 1 “planning activity” from his Day Planning List 0 days per week.                                             | On his phone calendar, P3 will schedule at least 1 “planning activity” from his Day Planning List 1–2 days per week. | On his phone calendar, P3 will schedule at least 1 “planning activity” from his Day Planning List 3–4 days per week.<br><b>ACHIEVED<sup>M</sup></b> | *On his phone calendar, P3 will schedule at least 1 “planning activity” from his Day Planning List 5–6 days per week.<br><b>ACHIEVED<sup>P</sup></b> | On his phone calendar, P3 will schedule at least 1 “planning activity” from his Day Planning List 7 days per week. |
| *“Use” of the Day Planning List is defined as circling at least 1 item on his Day Planning List <b>OR</b> writing at least 1 event under the “other” category. |                                                                                                                      |                                                                                                                                                     |                                                                                                                                                      |                                                                                                                    |

| <b>Home Goal 4: Initiation</b>                                                                                            |                                                                                                                   |                                                                                                                   |                                                                                                                                         |                                                                                           |
|---------------------------------------------------------------------------------------------------------------------------|-------------------------------------------------------------------------------------------------------------------|-------------------------------------------------------------------------------------------------------------------|-----------------------------------------------------------------------------------------------------------------------------------------|-------------------------------------------------------------------------------------------|
| <i>Following audible + visual phone alarms for a week of scheduled appointments:</i>                                      |                                                                                                                   |                                                                                                                   |                                                                                                                                         |                                                                                           |
| <b>-2</b>                                                                                                                 | <b>-1</b>                                                                                                         | <b>0</b>                                                                                                          | <b>+1</b>                                                                                                                               | <b>+2</b>                                                                                 |
| P3 will not initiate getting ready. He will rely on his current system, which includes his spouse cueing him to initiate. | P3 will initiate getting ready some of the time, but will require his spouse to cue him the majority of the time. | *P3 will initiate getting ready half the time, but will require his spouse to cue him the other half of the time. | P3 will initiate getting ready the majority of the time, but his spouse will cue him some of the time.<br><b>ACHIEVED<sup>P,M</sup></b> | P3 will initiate getting ready all the time, and his spouse did not cue him to get ready. |

| <b>Home Goal 5: Texting</b>                          |                                                              |                                                                                                 |                                                                  |                                                                                                 |
|------------------------------------------------------|--------------------------------------------------------------|-------------------------------------------------------------------------------------------------|------------------------------------------------------------------|-------------------------------------------------------------------------------------------------|
| *P3 will not attempt to text at all during the week. | P3 will need help all the time to compose and send messages. | P3 will need help most of the time to compose and send messages.<br><b>ACHIEVED<sup>M</sup></b> | P3 will need help some of the time to compose and send messages. | P3 will need help none of the time to compose and send messages.<br><b>ACHIEVED<sup>P</sup></b> |
